# Supplementary material
Source: publisher site journal article supplement (https://www.spandidos-publications.com/4899/downloadSupplementary)
Supplement: Supplementary file 1 [file downloadSupplementary]

## Sheet: Sheet1
Table SII. Calculating the risc score using Microsoft Excel 2016
Patient No.	Risk factors							Total Risk factors	Risk group	Risk of amputation, %
	Smoking	Obesity	Heart conditions	Dyslipidaemia	Duration of diabetes >5 years	Hepatic steatosis	Glycated haemoglobin >7.5 %
1	1	0	1	1	1	1	1	6	D	90
From column two to column 8, the following applies: 1= true, 0= false. The total number of risk factors must also be changed when entering the data in Microsoft Excel 2016. After that, by using the formula, the percentage changes automatically.
